# Supplementary material
Source: PubMed Central journal article supplement (PMC4480193)
Supplement: NIHMS692021-supplement-Acknowledgment_permission_form.pdf [file NIHMS692021-supplement-Acknowledgment_permission_form.pdf]

**AHA Journals Acknowledgment Permission Form**

**Journal:** Stroke

**Manuscript No.:** STROKE/2015/009162R1

**First author:** Yu-Yo Sun

**Title of work:** Prophylactic Edaravone Prevents Transient Hypoxic-Ischemic Brain Injury: Implications for Perioperative Neuroprotection

**Acknowledgment Permission:**

Authors must provide written permission/approval from all individuals mentioned by name in the Acknowledgements section of a submitted manuscript. **By signing this form, any and all acknowledged persons therefore state that they have read and approved the mention of their names in the Acknowledgment section of the aforementioned paper.**

Print Name: Tim Brown

Signature: 

Date: 14-MAY-2015

Please print and sign a copy. Then either fax or email a scanned copy to **Ms. Kate Bifolck** at the following address.

Kate Bifolck  
Assistant Managing Editor  
Stroke, Editorial Office  
560 Harrison Avenue, Suite 502  
Boston, MA 02118  
Tel: 617.542.5100, ext. 8795  
Fax: 617.542.6539  
[kbifolck@strokeahajournal.org](mailto:kbifolck@strokeahajournal.org)
